# Supplementary material for: Machine Learning Estimates of Natural Product Conformational Energies
Source: PLOS journal article supplement (doi:10.1371/journal.pcbi.1003400), 2014-01-16
Supplement: S2 (10.1371/journal.pcbi.1003400.s002) [file journal.pcbi.1003400.s002]

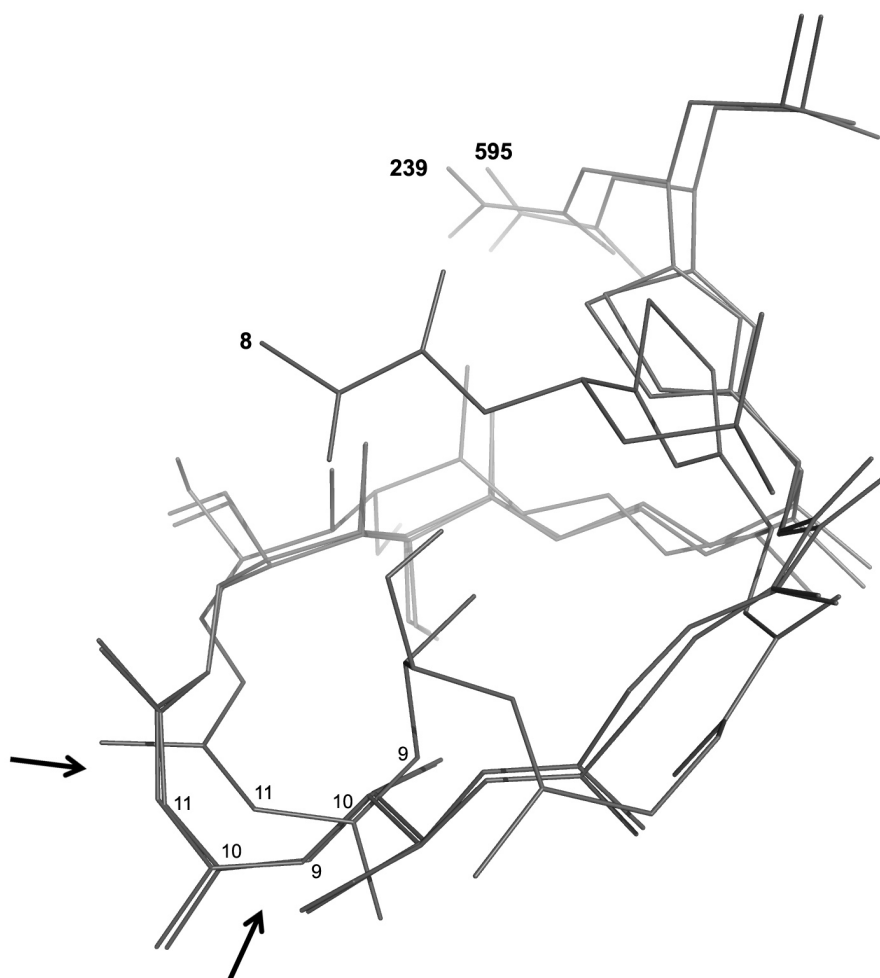

Figure S2: **Computed low energy conformations *d8*, *d239*, *d595* of Archazolid A.** The conformers display torsion angles close to  $55^\circ$  between the double bonds in positions 9 and 11 (arrows).
