# Supplementary material for: Machine Learning Estimates of Natural Product Conformational Energies
Source: PLOS journal article supplement (doi:10.1371/journal.pcbi.1003400), 2014-01-16
Supplement: S6 (10.1371/journal.pcbi.1003400.s006) [file journal.pcbi.1003400.s006]

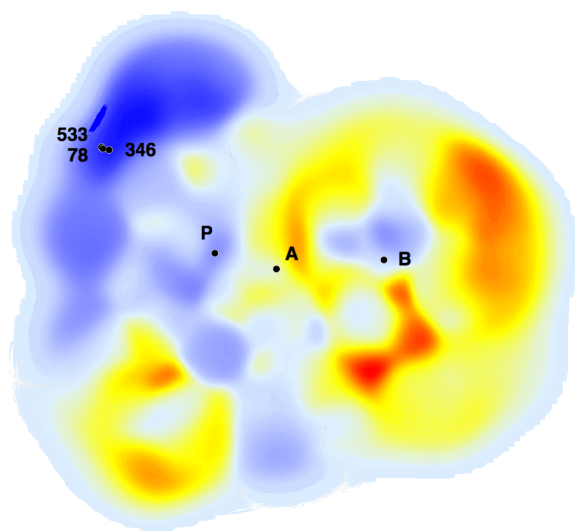

(a) AM1 conformations colored by DFT-D2 energies

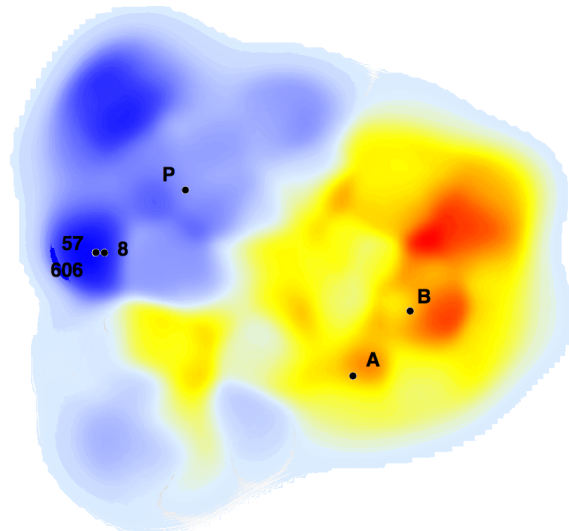

(b) DFT-D2 conformations colored by DFT-D2 energies

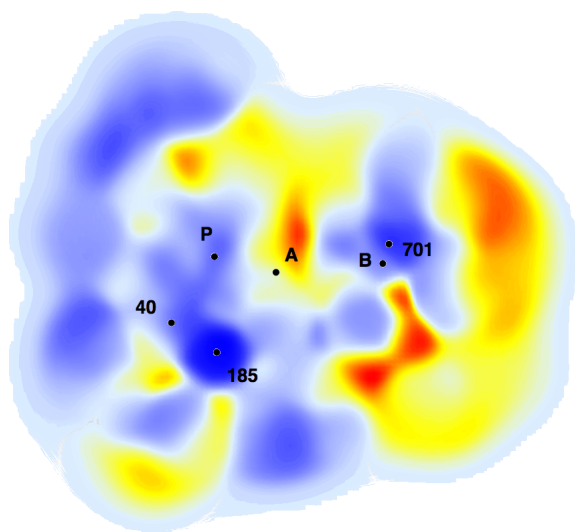

(c) AM1 conformations colored by DFT-D3 energies

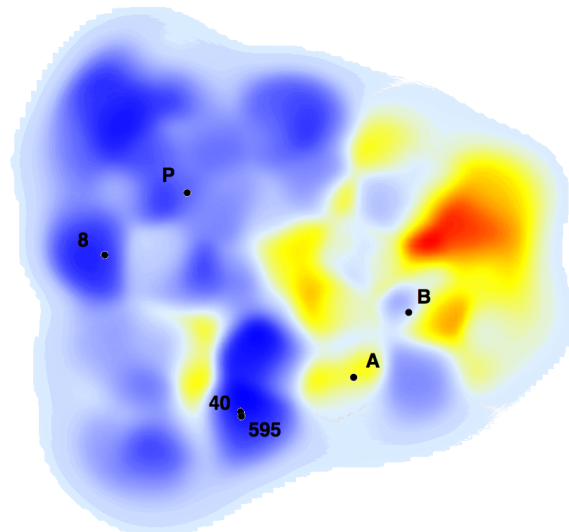

(d) DFT-D2 conformations colored by DFT-D3 energies

Figure S6: **Smoothed stochastic neighbor embedding visualizations with minimum energy conformations.** Shown are two-dimensional embeddings smoothed by Lisard using conformations relaxed by AM1 (a,c) and DFT-D2 (b,d), colored by DFT-D2 (a,b) and DFT-D3 energies (c,d).
